# Supplementary material for: Population-based cohort study of warfarin-treated patients with atrial fibrillation: incidence of cardiovascular and bleeding outcomes
Source: HighWire-hosted journal article supplement (doi:10.1136/bmjopen-2013-003839), 2014-01-01
Supplement: bmjopen-2013-003839supp.pdf [file bmjopen-2013-003839supp.pdf]

## **Supplementary material:**

### **Details on HES:**

The national registry of hospital admissions (HES) data contain details of all admissions to National Health Service (NHS) hospitals in England. The patients include private patients and those treated in NHS hospitals residing outside of England, as well as care delivered by treatment centres (including the independent sector) funded by the NHS. All NHS trusts in England, including acute hospitals, primary care trusts and mental health trusts are included. HES data are administrative data, designed to enable secondary use for healthcare analyses. The data are collected during a patient's time at hospital and are used to allow hospitals to be paid for the care they deliver. As the data are extracted from patients' notes, they may also reflect the quality of clinical record keeping. For each hospitalised patient, the hospital charts are reviewed, dates of admission and discharge and main diagnoses are extracted, coded by coding staff and collated nationally into HES.

**Table S1:** Incidence of cardiovascular outcomes for the cohort of AF patients eligible for linkage: Sensitivity Analyses - CPRD Read codes (N=16,513)

**Table S2:** Incidence of bleeding outcomes overall and in relation to VKA use for the cohort of AF patients eligible for linkage: Sensitivity analyses – Published ICD-10 codes (Hansen 2010, Olesen 2011)

**Table S3:** List of ICD-10 codes of bleeding definition

**Table S4:** Read codes for the definition of atrial fibrillation (AF)

**Table S5:** Comparison between total AF population in CPRD and the AF population eligible for HES/ONS linkage

**Table S1:**

| Event                             | N of Outcome Events | Person years | Incidence# (95% CI) | N of Outcome Events | Person years | Incidence# (95% CI) | N of Outcome Events | Person years | Incidence# (95% CI) | N of Outcome Events | Person years | Incidence# (95% CI) | N of Outcome Events | Person years | Incidence# (95% CI) |
|-----------------------------------|---------------------|--------------|---------------------|---------------------|--------------|---------------------|---------------------|--------------|---------------------|---------------------|--------------|---------------------|---------------------|--------------|---------------------|
|                                   | Overall             |              |                     | Current Use         |              |                     | Recent Use          |              |                     | Past Use            |              |                     | No use              |              |                     |
| <b>Vascular</b>                   | 1436                | 29854        | 4.8 (4.6 - 5.1)     | 272                 | 10776        | 2.5 (2.2 - 2.8)     | 78                  | 2183         | 3.6 (2.8 - 4.5)     | 151                 | 3577         | 4.2 (3.6 - 5.0)     | 935                 | 13319        | 7.0 (6.6 - 7.5)     |
| <b>Fatal<sup>a</sup> Vascular</b> | 111                 | 29854        | 0.4 (0.3 - 0.4)     | 23                  | 10776        | 0.2 (0.1 - 0.3)     | 15                  | 2183         | 0.7 (0.4 - 1.1)     | 9                   | 3577         | 0.3 (0.1 - 0.5)     | 64                  | 13319        | 0.5 (0.4 - 0.6)     |
| <b>Non-fatal Vascular</b>         | 1325                | 29854        | 4.4 (4.2 - 4.7)     | 249                 | 10776        | 2.3 (2.0 - 2.6)     | 63                  | 2183         | 2.9 (2.2 - 3.7)     | 142                 | 3577         | 4.0 (3.3 - 4.7)     | 871                 | 13319        | 6.5 (6.1 - 7.0)     |
| <b>MI</b>                         | 518                 | 31176        | 1.7 (1.5 - 1.8)     | 101                 | 11419        | 0.9 (0.7 - 1.1)     | 19                  | 2300         | 0.8 (0.5 - 1.3)     | 50                  | 3723         | 1.3 (1.0 - 1.8)     | 348                 | 13734        | 2.5 (2.3 - 2.8)     |
| <b>Fatal MI</b>                   | 57                  | 31176        | 0.2 (0.1 - 0.2)     | 12                  | 11419        | 0.1 (0.1 - 0.2)     | 5                   | 2300         | 0.2 (0.1 - 0.5)     | 2                   | 3723         | ¥                   | 38                  | 13734        | 0.3 (0.2 - 0.4)     |
| <b>Non-fatal MI</b>               | 461                 | 31176        | 1.5 (1.3 - 1.6)     | 89                  | 11419        | 0.8 (0.6 - 1.0)     | 14                  | 2300         | 0.6 (0.3 - 1.0)     | 48                  | 3723         | 1.3 (1.0 - 1.7)     | 310                 | 13734        | 2.3 (2.0 - 2.5)     |
| <b>Stroke</b>                     | 937                 | 30599        | 3.1 (2.9 - 3.3)     | 173                 | 11025        | 1.6 (1.3 - 1.8)     | 62                  | 2243         | 2.8 (2.1 - 3.5)     | 102                 | 3675         | 2.8 (2.3 - 3.4)     | 600                 | 13657        | 4.4 (4.0 - 4.8)     |
| <i>Haemorrhagic</i>               | 62                  | 31884        | 0.2 (0.1 - 0.2)     | 19                  | 11643        | 0.2 (0.1 - 0.3)     | 7                   | 2353         | 0.3 (0.1 - 0.6)     | 5                   | 3821         | ¥                   | 31                  | 14067        | 0.2 (0.1 - 0.3)     |
| <i>Ischemic</i>                   | 682                 | 30936        | 2.2 (2.0 - 2.4)     | 128                 | 11163        | 1.1 (1.0 - 1.4)     | 43                  | 2267         | 1.9 (1.4 - 2.6)     | 81                  | 3717         | 2.2 (1.7 - 2.7)     | 430                 | 13789        | 3.1 (2.8 - 3.4)     |
| <i>Unspecified</i>                | 241                 | 31603        | 0.8 (0.7 - 0.9)     | 39                  | 11522        | 0.3 (0.2 - 0.5)     | 17                  | 2333         | 0.7 (0.4 - 1.2)     | 19                  | 3788         | 0.5 (0.3 - 0.8)     | 166                 | 13959        | 1.2 (1.0 - 1.4)     |
| <b>Fatal Stroke</b>               | 57                  | 30599        | 0.2 (0.1 - 0.2)     | 13                  | 11025        | 0.1 (0.1 - 0.2)     | 10                  | 2243         | 0.4 (0.2 - 0.8)     | 8                   | 3675         | 0.2 (0.1 - 0.4)     | 26                  | 13657        | 0.2 (0.1 - 0.3)     |
| <i>Haemorrhagic</i>               | 15                  | 31884        | ¥                   | 9                   | 11643        | ¥                   | 1                   | 2353         | ¥                   | 2                   | 3821         | ¥                   | 3                   | 14067        | ¥                   |
| <i>Ischemic</i>                   | 22                  | 30936        | ¥                   | 3                   | 11163        | ¥                   | 3                   | 2267         | ¥                   | 3                   | 3717         | ¥                   | 13                  | 13789        | 0.1 (0.1 - 0.2)     |
| <i>Unspecified</i>                | 25                  | 31603        | 0.1 (0.1 - 0.1)     | 5                   | 11522        | ¥                   | 6                   | 2333         | 0.3 (0.1 - 0.6)     | 3                   | 3788         | ¥                   | 11                  | 13959        | ¥                   |
| <b>Non-fatal Stroke</b>           | 880                 | 30599        | 2.9 (2.7 - 3.1)     | 160                 | 11025        | 1.5 (1.2 - 1.7)     | 52                  | 2243         | 2.3 (1.7 - 3.0)     | 94                  | 3675         | 2.6 (2.1 - 3.1)     | 574                 | 13657        | 4.2 (3.9 - 4.6)     |
| <i>Haemorrhagic</i>               | 47                  | 31884        | 0.1 (0.1 - 0.2)     | 10                  | 11643        | ¥                   | 6                   | 2353         | 0.3 (0.1 - 0.6)     | 3                   | 3821         | ¥                   | 28                  | 14067        | 0.2 (0.1 - 0.3)     |
| <i>Ischemic</i>                   | 660                 | 30936        | 2.1 (2.0 - 2.3)     | 125                 | 11163        | 1.1 (0.9 - 1.3)     | 40                  | 2267         | 1.8 (1.3 - 2.4)     | 78                  | 3717         | 2.1 (1.7 - 2.6)     | 417                 | 13789        | 3.0 (2.7 - 3.3)     |
| <i>Unspecified</i>                | 216                 | 31603        | 0.7 (0.6 - 0.8)     | 34                  | 11522        | 0.3 (0.2 - 0.4)     | 11                  | 2333         | 0.5 (0.3 - 0.8)     | 16                  | 3788         | 0.4 (0.2 - 0.7)     | 155                 | 13959        | 1.1 (0.9 - 1.3)     |
| <b>SPAE</b>                       | 29                  | 31897        | 0.1 (0.1 - 0.1)     | 11                  | 11633        | ¥                   | 0                   | 2354         | ¥                   | 4                   | 3828         | ¥                   | 14                  | 14082        | 0.1 (0.1 - 0.2)     |
| <b>Fatal SPAE</b>                 | 1                   | 31897        | ¥                   | 0                   | 11633        | ¥                   | 0                   | 2354         | ¥                   | 1                   | 3828         | ¥                   | 0                   | 14082        | ¥                   |
| <b>Non-fatal SPAE</b>             | 28                  | 31897        | 0.1 (0.1 - 0.1)     | 11                  | 11633        | ¥                   | 0                   | 2354         | ¥                   | 3                   | 3828         | ¥                   | 14                  | 14082        | 0.1 (0.1 - 0.2)     |

# Number of cases per 100 person years

<sup>a</sup> Fatal events were those where the date of death from the CPRD algorithm was within 10 days of the outcome

**Table S2:**

| Event                      | N of Outcome Events | Person years | Incidence# (95% CI) | N of Outcome Events | Person years | Incidence# (95% CI) | N of Outcome Events | Person years | Incidence# (95% CI) | N of Outcome Events | Person years | Incidence# (95% CI) | N of Outcome Events | Person years | Incidence# (95% CI) |
|----------------------------|---------------------|--------------|---------------------|---------------------|--------------|---------------------|---------------------|--------------|---------------------|---------------------|--------------|---------------------|---------------------|--------------|---------------------|
|                            | Overall             |              |                     | Current Use         |              |                     | Recent Use          |              |                     | Past Use            |              |                     | No use              |              |                     |
| <b>All Bleed</b>           | 782                 | 31004        | 2.5 (2.3 - 2.7)     | 335                 | 11340        | 3.0 (2.6 - 3.3)     | 77                  | 2262         | 3.4 (2.7 - 4.3)     | 71                  | 3637         | 2.0 (1.5 - 2.5)     | 299                 | 13765        | 2.2 (1.9 - 2.4)     |
| <i>Intracranial Bleed</i>  | 120                 | 31854        | 0.4 (0.3 - 0.5)     | 46                  | 11654        | 0.4 (0.3 - 0.5)     | 15                  | 2353         | 0.6 (0.4 - 1.1)     | 8                   | 3811         | 0.2 (0.1 - 0.4)     | 51                  | 14036        | 0.4 (0.3 - 0.5)     |
| <i>Extra-cranial Bleed</i> | 662                 | 31090        | 2.1 (2.0 - 2.3)     | 289                 | 11349        | 2.5 (2.3 - 2.9)     | 62                  | 2268         | 2.7 (2.1 - 3.5)     | 63                  | 3657         | 1.7 (1.3 - 2.2)     | 248                 | 13816        | 1.8 (1.6 - 2.0)     |
| <i>GI Bleed</i>            | 209                 | 31703        | 0.7 (0.6 - 0.8)     | 64                  | 11609        | 0.6 (0.4 - 0.7)     | 18                  | 2342         | 0.8 (0.5 - 1.2)     | 23                  | 3768         | 0.6 (0.4 - 0.9)     | 104                 | 13984        | 0.7 (0.6 - 0.9)     |
| <b>Fatal Bleed</b>         | 64                  | 31004        | 0.2 (0.2 - 0.3)     | 27                  | 11340        | 0.2 (0.2 - 0.3)     | 9                   | 2262         | 0.4 (0.2 - 0.8)     | 6                   | 3637         | 0.2 (0.1 - 0.4)     | 22                  | 13765        | 0.2 (0.1 - 0.2)     |
| <i>Intracranial Bleed</i>  | 45                  | 31854        | 0.1 (0.1 - 0.2)     | 23                  | 11654        | 0.2 (0.1 - 0.3)     | 6                   | 2353         | 0.3 (0.1 - 0.6)     | 5                   | 3811         | 0.1 (0.0 - 0.3)     | 11                  | 14036        | 0.1 (0.0 - 0.1)     |
| <i>Extra-cranial Bleed</i> | 19                  | 31090        | 0.1 (0.0 - 0.1)     | 4                   | 11349        | 0.0 (0.0 - 0.1)     | 3                   | 2268         | 0.1 (0.0 - 0.4)     | 1                   | 3657         | 0.0 (0.0 - 0.2)     | 11                  | 13816        | 0.1 (0.0 - 0.1)     |
| <i>GI Bleed</i>            | 17                  | 31703        | 0.1 (0.0 - 0.1)     | 3                   | 11609        | 0.0 (0.0 - 0.1)     | 3                   | 2342         | 0.1 (0.0 - 0.4)     | 1                   | 3768         | 0.0 (0.0 - 0.1)     | 10                  | 13984        | 0.1 (0.0 - 0.1)     |
| <b>Non-Fatal Bleed</b>     | 718                 | 31004        | 2.3 (2.1 - 2.5)     | 308                 | 11340        | 2.7 (2.4 - 3.0)     | 68                  | 2262         | 3.0 (2.3 - 3.8)     | 65                  | 3637         | 1.8 (1.4 - 2.3)     | 277                 | 13765        | 2.0 (1.8 - 2.3)     |
| <i>Intracranial Bleed</i>  | 75                  | 31854        | 0.2 (0.2 - 0.3)     | 23                  | 11654        | 0.2 (0.1 - 0.3)     | 9                   | 2353         | 0.4 (0.2 - 0.7)     | 3                   | 3811         | 0.1 (0.0 - 0.2)     | 40                  | 14036        | 0.3 (0.2 - 0.4)     |
| <i>Extra-cranial Bleed</i> | 643                 | 31090        | 2.1 (1.9 - 2.2)     | 285                 | 11349        | 2.5 (2.2 - 2.8)     | 59                  | 2268         | 2.6 (2.0 - 3.4)     | 62                  | 3657         | 1.7 (1.3 - 2.2)     | 237                 | 13816        | 1.7 (1.5 - 1.9)     |
| <i>GI Bleed</i>            | 192                 | 31703        | 0.6 (0.5 - 0.7)     | 61                  | 11609        | 0.5 (0.4 - 0.7)     | 15                  | 2342         | 0.6 (0.4 - 1.1)     | 22                  | 3768         | 0.6 (0.4 - 0.9)     | 94                  | 13984        | 0.7 (0.5 - 0.8)     |

# Number of cases per 100 person years

**Table S3:**

| ICD Code | ICD Term                                                     | Type               | included in literature definition |
|----------|--------------------------------------------------------------|--------------------|-----------------------------------|
| I85.0    | Oesophageal varices with bleeding                            | gastrointestinal   | -                                 |
| K25.0    | Gastric ulcer, acute with haemorrhage                        | gastrointestinal   | +                                 |
| K25.2    | Gastric ulcer, acute with both haemorrhage and perforation   | gastrointestinal   | -                                 |
| K25.4    | Gastric ulcer, chronic or unspecified with haemorrhage       | gastrointestinal   | +                                 |
| K25.6    | Chronic or unspecified with both haemorrhage and perforation | gastrointestinal   | -                                 |
| K26.0    | Duodenal ulcer, acute with haemorrhage                       | gastrointestinal   | +                                 |
| K26.2    | Duodenal ulcer, acute with both haemorrhage and perforation  | gastrointestinal   | -                                 |
| K26.4    | Duodenal ulcer, chronic or unspecified with haemorrhage      | gastrointestinal   | +                                 |
| K26.6    | Chronic or unspecified with both haemorrhage and perforation | gastrointestinal   | -                                 |
| K27.0    | Peptic ulcer, acute with haemorrhage                         | gastrointestinal   | +                                 |
| K27.2    | Peptic ulcer, acute with both haemorrhage and perforation    | gastrointestinal   | -                                 |
| K27.4    | Peptic ulcer, chronic or unspecified with haemorrhage        | gastrointestinal   | -                                 |
| K27.6    | Chronic or unspecified with both haemorrhage and perforation | gastrointestinal   | -                                 |
| K28.0    | Gastrojejunal ulcer, acute with haemorrhage                  | gastrointestinal   | +                                 |
| K28.2    | Acute with both haemorrhage and perforation                  | gastrointestinal   | -                                 |
| K28.4    | Gastrojejunal ulcer, chronic or unspecified with haemorrhage | gastrointestinal   | -                                 |
| K28.6    | Chronic or unspecified with both haemorrhage and perforation | gastrointestinal   | -                                 |
| K29.0    | Acute haemorrhagic gastritis                                 | gastrointestinal   | -                                 |
| K62.5    | Haemorrhage of anus and rectum                               | gastrointestinal   | -                                 |
| K66.1    | Haemoperitoneum                                              | gastrointestinal   | -                                 |
| K92.0    | Haematemesis                                                 | gastrointestinal   | +                                 |
| K92.1    | Melaena                                                      | gastrointestinal   | +                                 |
| K92.2    | Gastrointestinal haemorrhage, unspecified                    | gastrointestinal   | +                                 |
| I60      | Subarachnoid haemorrhage                                     | Intracranial_bleed | +                                 |
| I60.0    | Subarachnoid haemorrhage from carotid siphon and bifurcation | Intracranial_bleed | +                                 |
| I60.1    | Subarachnoid haemorrhage from middle cerebral artery         | Intracranial_bleed | +                                 |
| I60.2    | Subarachnoid haemorrhage from anterior communicating artery  | Intracranial_bleed | +                                 |
| I60.3    | Subarachnoid haemorrhage from posterior communicating artery | Intracranial_bleed | +                                 |
| I60.4    | Subarachnoid haemorrhage from basilar artery                 | Intracranial_bleed | +                                 |
| I60.5    | Subarachnoid haemorrhage from vertebral artery               | Intracranial_bleed | +                                 |
| I60.6    | Subarachnoid haemorrhage from other intracranial arteries    | Intracranial_bleed | +                                 |
| I60.7    | Subarachnoid haemorrhage from intracranial artery, unspec    | Intracranial_bleed | +                                 |
| I60.8    | Other subarachnoid haemorrhage                               | Intracranial_bleed | +                                 |
| I60.9    | Subarachnoid haemorrhage, unspecified                        | Intracranial_bleed | +                                 |
| I61      | Intracerebral haemorrhage                                    | Intracranial_bleed | +                                 |
| I61.0    | Intracerebral haemorrhage in hemisphere, subcortical         | Intracranial_bleed | +                                 |
| I61.1    | Intracerebral haemorrhage in hemisphere, cortical            | Intracranial_bleed | +                                 |
| I61.2    | Intracerebral haemorrhage in hemisphere, unspecified         | Intracranial_bleed | +                                 |
| I61.3    | Intracerebral haemorrhage in brain stem                      | Intracranial_bleed | +                                 |
| I61.4    | Intracerebral haemorrhage in cerebellum                      | Intracranial_bleed | +                                 |
| I61.5    | Intracerebral haemorrhage, intraventricular                  | Intracranial_bleed | +                                 |
| I61.6    | Intracerebral haemorrhage, multiple localized                | Intracranial_bleed | +                                 |
| I61.8    | Other intracerebral haemorrhage                              | Intracranial_bleed | +                                 |
| I61.9    | Intracerebral haemorrhage, unspecified                       | Intracranial_bleed | +                                 |
| I62      | Other nontraumatic intracranial haemorrhage                  | Intracranial_bleed | +                                 |
| I62.0    | Subdural haemorrhage (acute)(nontraumatic)                   | Intracranial_bleed | +                                 |
| I62.1    | Nontraumatic extradural haemorrhage                          | Intracranial_bleed | +                                 |
| I62.9    | Intracranial haemorrhage (nontraumatic), unspecified         | Intracranial_bleed | +                                 |
| I69.0    | Sequelae of subarachnoid haemorrhage                         | Intracranial_bleed | +                                 |
| I69.1    | Sequelae of intracerebral haemorrhage                        | Intracranial_bleed | +                                 |
| I69.2    | Sequelae of other nontraumatic intracranial haemorrhage      | Intracranial_bleed | +                                 |
| S06.4    | Epidural haemorrhage                                         | Intracranial_bleed | +                                 |

|       |                                                            |                    |   |
|-------|------------------------------------------------------------|--------------------|---|
| S06.5 | Traumatic subdural haemorrhage                             | Intracranial_bleed | + |
| S06.6 | Traumatic subarachnoid haemorrhage                         | Intracranial_bleed | + |
| J94.2 | Haemothorax                                                | Airway_bleed       | + |
| R04   | Haemorrhage from respiratory passages                      | Airway_bleed       | + |
| R04.0 | Epistaxis                                                  | Airway_bleed       | + |
| R04.1 | Haemorrhage from throat                                    | Airway_bleed       | + |
| R04.2 | Haemoptysis                                                | Airway_bleed       | + |
| R04.8 | Haemorrhage from other sites in respiratory passages       | Airway_bleed       | + |
| R04.9 | Haemorrhage from respiratory passages, unspecified         | Airway_bleed       | + |
| N02   | Recurrent and persistent haematuria                        | Urinarytract_bleed | + |
| N02.6 | Recurrent and persistent haematuria, dense deposit disease | Urinarytract_bleed | + |
| N02.8 | Recurrent and persistent haematuria, other                 | Urinarytract_bleed | + |
| N02.9 | Recurrent and persistent haematuria, unspecified           | Urinarytract_bleed | + |
| R31   | Unspecified haematuria                                     | Urinarytract_bleed | + |
| D68.3 | Haemorrhagic disorder due to circulating anticoagulants    | blood              | - |
| H35.6 | Retinal haemorrhage                                        | eyes               | - |
| H43.1 | Vitreous haemorrhage                                       | eyes               | - |
| H45.0 | Vitreous haemorrhage in diseases classified elsewhere      | eyes               | - |
| H92.2 | Otorrhagia                                                 | ear                | - |
| I23.0 | Haemopericardium as curr comp folow acut myocard infarct   | heart              | - |
| I31.2 | Haemopericardium, not elsewhere classified                 | heart              | - |
| I71.1 | Thoracic aortic aneurysm, ruptured                         | thorax             | - |
| I71.3 | Abdominal aortic aneurysm, ruptured                        | abdomen            | - |
| I71.5 | Thoracoabdominal aortic aneurysm, ruptured                 | abdomen            | - |
| I71.8 | Aortic aneurysm of unspecified site, ruptured              | unknown            | - |
| I84.1 | Internal haemorrhoids with other complications             | rectum             | - |
| I84.3 | External thrombosed haemorrhoids                           | rectum             | - |
| I84.4 | External haemorrhoids with other complications             | rectum             | - |
| I84.8 | Unspecified haemorrhoids with other complications          | rectum             | - |
| N42.1 | Congestion and haemorrhage of prostate                     | kidney             | - |
| N83.6 | Haematosalpinx                                             | kidney             | - |
| N85.7 | Haematometra                                               | kidney             | - |
| N89.7 | Haematocolpos                                              | kidney             | - |
| N92.1 | Excessive and frequent menstruation with irregular cycle   | uterus             | - |
| N92.5 | Other specified irregular menstruation                     | uterus             | - |
| N92.6 | Irregular menstruation, unspecified                        | uterus             | - |
| N93   | Other abnormal uterine and vaginal bleeding                | uterus             | - |
| N93.8 | Other specified abnormal uterine and vaginal bleeding      | uterus             | - |
| N93.9 | Abnormal uterine and vaginal bleeding, unspecified         | uterus             | - |
| N95.0 | Postmenopausal bleeding                                    | uterus             | - |
| R23.3 | Spontaneous ecchymoses                                     | respiratory        | - |
| R58   | Haemorrhage, not elsewhere classified                      | respiratory        | - |
| T79.2 | Traumatic secondary and recurrent haemorrhage              | unknown            | - |
| T81.0 | Haemorrhage and hematoma complicating a procedure NEC      | unknown            | - |

Table S4:

| <b>Read code</b> | <b>Read term</b>                                      |
|------------------|-------------------------------------------------------|
| 3272.00          | ECG: atrial fibrillation                              |
| 6625.00          | Atrial fibrillation monitoring                        |
| 6A9..00          | Atrial fibrillation annual review                     |
| 7936A00          | Implant intravenous pacemaker for atrial fibrillation |
| 90s..00          | Atrial fibrillation monitoring administration         |
| 90s0.00          | Atrial fibrillation monitoring first letter           |
| 90s1.00          | Atrial fibrillation monitoring second letter          |
| 90s2.00          | Atrial fibrillation monitoring third letter           |
| 90s3.00          | Atrial fibrillation monitoring verbal invite          |
| 90s4.00          | Atrial fibrillation monitoring telephone invite       |
| G573.00          | Atrial fibrillation and flutter                       |
| G573000          | Atrial fibrillation                                   |
| G573200          | Paroxysmal atrial fibrillation                        |
| G573300          | Non-rheumatic atrial fibrillation                     |
| G573400          | Permanent atrial fibrillation                         |
| G573500          | Persistent atrial fibrillation                        |
| G573z00          | Atrial fibrillation and flutter NOS                   |

Table S5:

| Characteristic                                     | All incident AF patients | AF patients eligible for HES/Ons linkage |
|----------------------------------------------------|--------------------------|------------------------------------------|
|                                                    | N=42,008                 | N=16,513                                 |
| <b>Length of follow-up (years): Mean (sd)</b>      | 2.4 (1.6)                | 1.9 (1.4)                                |
| <b>Length of follow-up (years): Median (Range)</b> | 2.2 (0 – 6)              | 1.7 (0 – 5)                              |
| <b>Age: Mean (sd)</b>                              | 74 (12)                  | 74 (12.0)                                |
| <b>Age: Median (Range)</b>                         | 76 (18 – 107)            | 76 (21 – 107)                            |
| <b>Age &lt;40</b>                                  | 502 (1.2%)               | 192 (1.2%)                               |
| <b>Age 40 - &lt;50</b>                             | 1,217 (2.9%)             | 462 (2.8%)                               |
| <b>Age 50 - &lt;65</b>                             | 6,609 (15.7%)            | 2,549 (15.4%)                            |
| <b>Age 65 - &lt;75</b>                             | 10,656 (25.4%)           | 4,120 (25.0%)                            |
| <b>Age 75 - &lt;80</b>                             | 7,458 (17.8%)            | 2,913 (17.6%)                            |
| <b>Age &gt;=80</b>                                 | 15,566 (37.1%)           | 6,277 (38.0%)                            |
| <b>Female</b>                                      | 19,934 (47.5%)           | 7,921 (48.0%)                            |
| <b>Male</b>                                        | 22,074 (52.5%)           | 8,592 (52.0%)                            |
| <b>Year of Diagnosis</b>                           |                          |                                          |
| <b>2005</b>                                        | 8,065 (19.2%)            | 3,443 (20.9%)                            |
| <b>2006</b>                                        | 8,454 (20.1%)            | 3,516 (21.3%)                            |
| <b>2007</b>                                        | 8,075 (19.2%)            | 3,428 (20.8%)                            |
| <b>2008</b>                                        | 8,125 (19.3%)            | 3,548 (21.5%)                            |
| <b>2009</b>                                        | 8,027 (19.1%)            | 2,578 (15.6%)                            |
| <b>BMI: Mean (sd)</b>                              | 28 (6)                   | 28 (6)                                   |
| <b>BMI: Median (Range)</b>                         | 27 (12 – 70)             | 27 (12 – 70)                             |
| <b>BMI &lt;25</b>                                  | 13,216 (31.5%)           | 5,312 (32.2%)                            |
| <b>BMI 25 - &lt;30</b>                             | 14,237 (33.9%)           | 5,611 (34.0%)                            |
| <b>BMI 30 - &lt;35</b>                             | 7,306 (17.4%)            | 2,821 (17.1%)                            |
| <b>BMI &gt;=35</b>                                 | 3,950 (9.4%)             | 1,532 (9.3%)                             |
| <b>BMI: Unknown</b>                                | 3,299 (7.9%)             | 1,237 (7.5%)                             |
| <b>Smoking Status</b>                              |                          |                                          |
| <b>Non Smoker</b>                                  | 17,391 (41.4%)           | 6,822 (41.3%)                            |
| <b>Ex Smoker</b>                                   | 18,694 (44.5%)           | 7,470 (45.2%)                            |
| <b>Smoker</b>                                      | 5,235 (12.5%)            | 2,003 (12.1%)                            |
| <b>Smoking Status: Unknown</b>                     | 688 (1.6%)               | 218 (1.3%)                               |
| <b>Drinking Status</b>                             |                          |                                          |
| <b>Non Drinker</b>                                 | 4,713 (11.2%)            | 1,692 (10.2%)                            |
| <b>Ex Drinker</b>                                  | 4,251 (10.1%)            | 1,623 (9.8%)                             |
| <b>Drinker</b>                                     | 28,749 (68.4%)           | 11,601 (70.3%)                           |
| <b>Drinking Status: Unknown</b>                    | 4,295 (10.2%)            | 1,597 (9.7%)                             |
| <b>Patient Deprivation</b>                         |                          |                                          |
| <b>0 (Least Deprived)</b>                          | 3,342 (8.0%)             | 2,753 (16.7%)                            |
| <b>1</b>                                           | 3,403 (8.1%)             | 2,896 (17.5%)                            |
| <b>2</b>                                           | 3,133 (7.5%)             | 2,635 (16.0%)                            |
| <b>3</b>                                           | 2,931 (7.0%)             | 2,451 (14.8%)                            |
| <b>4 (Most Deprived)</b>                           | 2,653 (6.3%)             | 2,226 (13.5%)                            |
| <b>Patient Deprivation: Unknown</b>                | 26,546 (63.2%)           | 3,552 (21.5%)                            |
| <b>CHADS2 risk score: Mean (sd)</b>                | 1.48 (1.18)              | 1.50 (1.18)                              |
| <b>CHADS2 risk score: Median (IQR)</b>             | 1 (1-2)                  | 1 (1-2)                                  |
| <b>0</b>                                           | 9,086 (21.6%)            | 3,493 (21.2%)                            |
| <b>1</b>                                           | 14,080 (33.5%)           | 5,508 (33.4%)                            |
| <b>2</b>                                           | 11,544 (27.5%)           | 4,605 (27.9%)                            |

|                                             |                                        |                |                |
|---------------------------------------------|----------------------------------------|----------------|----------------|
|                                             | <b>3</b>                               | 4,498 (10.7%)  | 1,778 (10.8%)  |
|                                             | <b>4</b>                               | 2,157 (5.1%)   | 846 (5.1%)     |
|                                             | <b>5</b>                               | 588 (1.4%)     | 260 (1.6%)     |
|                                             | <b>6</b>                               | 55 (0.1%)      | 23 (0.1%)      |
| <b>CHADS2-Vasc risk score: Mean (sd)</b>    |                                        | 3.01 (1.76)    | 3.04 (1.77)    |
| <b>CHADS2-Vasc risk score: Median (IQR)</b> |                                        | 3 (2-4)        | 3 (2-4)        |
|                                             | <b>0</b>                               | 3,294 (7.8%)   | 1,258 (7.6%)   |
|                                             | <b>1</b>                               | 5,195 (12.4%)  | 1,974 (12.0%)  |
|                                             | <b>2</b>                               | 7,978 (19.0%)  | 3,099 (18.8%)  |
|                                             | <b>3</b>                               | 10,244 (24.4%) | 4,049 (24.5%)  |
|                                             | <b>4</b>                               | 7,996 (19.0%)  | 3,234 (19.6%)  |
|                                             | <b>5</b>                               | 3,330 (7.9%)   | 1,290 (7.8%)   |
|                                             | <b>6</b>                               | 2,203 (5.2%)   | 861 (5.2%)     |
|                                             | <b>7</b>                               | 1,389 (3.3%)   | 587 (3.6%)     |
|                                             | <b>8</b>                               | 353 (0.8%)     | 153 (0.9%)     |
|                                             | <b>9</b>                               | 26 (0.1%)      | 8 (0.0%)       |
| <b><u>History of[1]:</u></b>                |                                        |                |                |
|                                             | <b>Acute myocardial infarction</b>     | 4,089 (9.7%)   | 1,621 (9.8%)   |
|                                             | <b>Stroke</b>                          | 4,519 (10.8%)  | 1,844 (11.2%)  |
|                                             | <b>SPAE</b>                            | 115 (0.3%)     | 49 (0.3%)      |
|                                             | <b>Vascular event</b>                  | 8,098 (19.3%)  | 3,273 (19.8%)  |
|                                             | <b>CAD</b>                             | 7,201 (17.1%)  | 2,776 (16.8%)  |
|                                             | <b>CHF</b>                             | 3,415 (8.1%)   | 1,357 (8.2%)   |
|                                             | <b>Hypertension</b>                    | 20,458 (48.7%) | 8,113 (49.1%)  |
|                                             | <b>Diabetes</b>                        | 6,625 (15.8%)  | 2,526 (15.3%)  |
|                                             | <b>Liver Impairment</b>                | 808 (1.9%)     | 337 (2.0%)     |
|                                             | <b>Renal Impairment</b>                | 6,531 (15.5%)  | 2,513 (15.2%)  |
| <b><u>Treatment with[2]:</u></b>            |                                        |                |                |
|                                             | <b>Anti-arrhythmics</b>                | 3,372 (8.0%)   | 1,422 (8.6%)   |
|                                             | <b>Statins</b>                         | 14,908 (35.5%) | 5,722 (34.7%)  |
|                                             | <b>Antiplatelets</b>                   | 20,935 (49.8%) | 8,148 (49.3%)  |
|                                             | <b>Aspirin</b>                         | 19,519 (46.5%) | 7,599 (46.0%)  |
|                                             | <i>Low dose aspirin (&lt;100mg)</i>    | 18,841 (44.9%) | 7,331 (44.4%)  |
|                                             | <i>High dose aspirin (100mg+)</i>      | 881 (2.1%)     | 346 (2.1%)     |
|                                             | <b>Clopidogrel</b>                     | 2,130 (5.1%)   | 816 (4.9%)     |
|                                             | <b>Other anti-platelets</b>            | 884 (2.1%)     | 309 (1.9%)     |
|                                             | <b>Anticoagulants</b>                  | 4,796 (11.4%)  | 1,816 (11.0%)  |
|                                             | <b>Anti-diabetics</b>                  | 3,876 (9.2%)   | 1,498 (9.1%)   |
|                                             | <b>Oral anti-diabetics</b>             | 3,374 (8.0%)   | 1,301 (7.9%)   |
|                                             | <b>Insulin</b>                         | 937 (2.2%)     | 365 (2.2%)     |
|                                             | <b>Other injectable anti-diabetics</b> | 6 (<0.1%)      | 2 (<0.1%)      |
|                                             | <b><u>Antihypertensives[3]</u></b>     | 27,250 (64.9%) | 10,747 (65.1%) |

[1] Comorbidities were measured prior to the index date in GPRD.

[2] Treatments are measured in the 90 days prior to index date.

[3] Antihypertensives include Angiotensin-converting enzyme inhibitors, Angiotensin-II receptor antagonists, Beta-adrenoceptor blocking drugs, Calcium channel blockers, Centrally-acting antihypertensive drugs, Diuretics with potassium, Thiazides and related diuretics.
